# Supplementary material
Source: publisher figshare collection journal article supplement (https://asha.figshare.com/ndownloader/files/34148433)

**Supplemental Figure S3.** Number of participants with present or absent ipsilateral acoustic reflex thresholds (1 kHz) present at  $\leq 100$  dB HL.

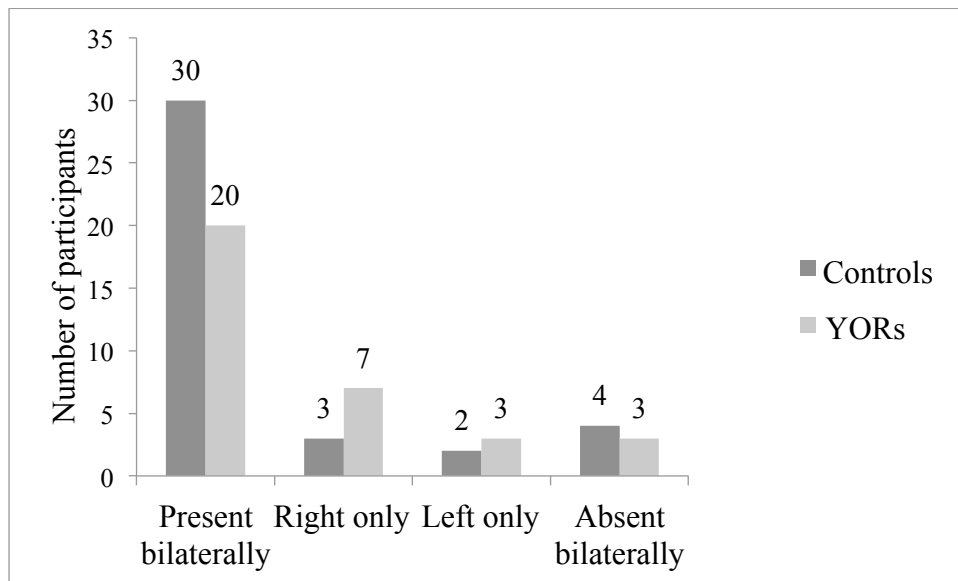

Supplement: Supplementary file 1 [file 34148433]
